# Supplementary material for: Screening antimicrobial peptides and probiotics using multiple deep learning and directed evolution strategies
Source: PubMed Central journal article supplement — Acta Pharm Sin B. 2024 May 10;14(8):3476–92. doi: 10.1016/j.apsb.2024.05.003 (PMC11372459; doi:10.1016/j.apsb.2024.05.003), 2024-05-10
Supplement: mmc1.pdf [file mmc1.pdf]

## Supporting Information for

### Tools

#### Screening antimicrobial peptides and probiotics using multiple deep learning and directed evolution strategies

Yu Zhang<sup>a,†</sup>, Li-Hua Liu<sup>a,b,†</sup>, Bo Xu<sup>c,†</sup>, Zhiqian Zhang<sup>a,†</sup>, Min Yang<sup>a,†</sup>, Yiyang He<sup>d,†</sup>, Jingjing Chen<sup>e,†</sup>, Yang Zhang<sup>a</sup>, Yucheng Hu<sup>a</sup>, Xipeng Chen<sup>a</sup>, Zitong Sun<sup>a</sup>, Qijun Ge<sup>a</sup>, Song Wu<sup>a</sup>, Wei Lei<sup>a</sup>, Kaizheng Li<sup>a</sup>, Hua Cui<sup>a</sup>, Gangzhu Yang<sup>a</sup>, Xuemei Zhao<sup>a</sup>, Man Wang<sup>e</sup>, Jiaqi Xia<sup>f,\*</sup>, Zhen Cao<sup>e,\*</sup>, Ao Jiang<sup>a,\*</sup>, Yi-Rui Wu<sup>a,\*</sup>

<sup>a</sup>*Tidetron Bioworks Technology (Guangzhou) Co., Ltd., Guangzhou Qianxiang Bioworks Co., Ltd., Guangzhou 510000, China*

<sup>b</sup>*Biology Department and Institute of Marine Sciences, College of Science, Shantou University, Shantou 515063, China*

<sup>c</sup>*School of Basic Medical Sciences, Hubei University of Science and Technology, Xianning 437100, China*

<sup>d</sup>*School of Education, Jiangnan University, Wuhan 430056, China*

<sup>e</sup>*Yeasen Biotechnology (Shanghai) Co., Ltd., Shanghai 200000, China*

<sup>f</sup>*School of Basic Medicine, Jiamusi University, Jiamusi 154000, China*

<sup>†</sup>These authors made equal contributions to this work.

\*Corresponding authors.

E-mail addresses: wuyirui@tidetronbio.com (Yi-Rui Wu), jiaqixia@whu.edu.cn (Jiaqi Xia Xia), jiangao@tidetronbio.com (Ao Jiang).

Received 4 January 2024; received in revised form 25 March 2024; accepted 6 May 2024

**This PDF file includes:**

Supplementary Figures. S1 to S11  
Supplementary Tables S1 and S3  
Legends for Supplementary tables S2, S4, and to S5

**Other Supplementary Material for this manuscript includes the following:**

Supplementary Tables S2, S4, and to S5

A

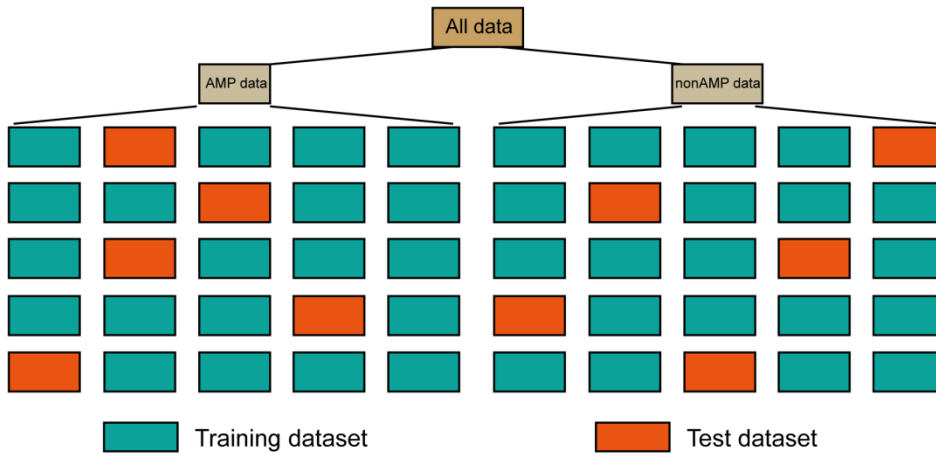

B

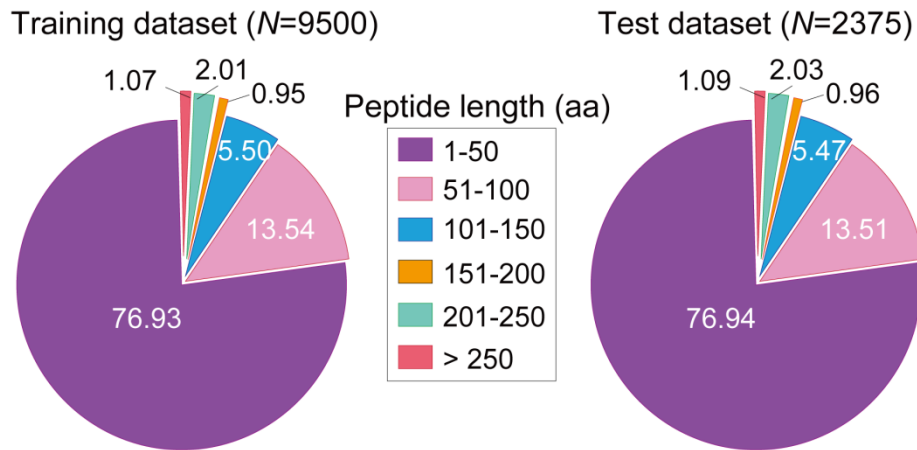

**Figure S1** Dataset processing of training and test data. (A) All data was divided into training and test datasets by 4:1 proportion. (B) The length distribution of peptides in training and test datasets.

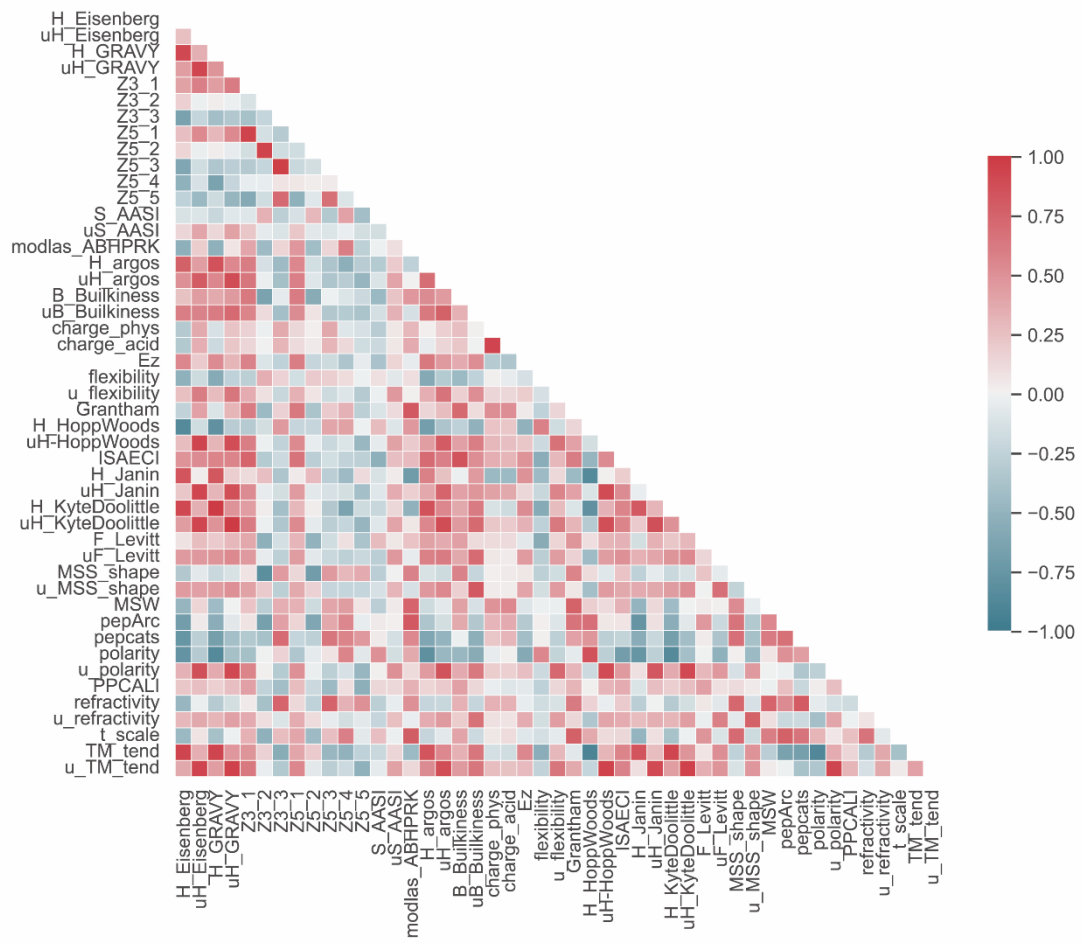

**Figure S2** The correlation of AMPs characterization in COMDEL model.

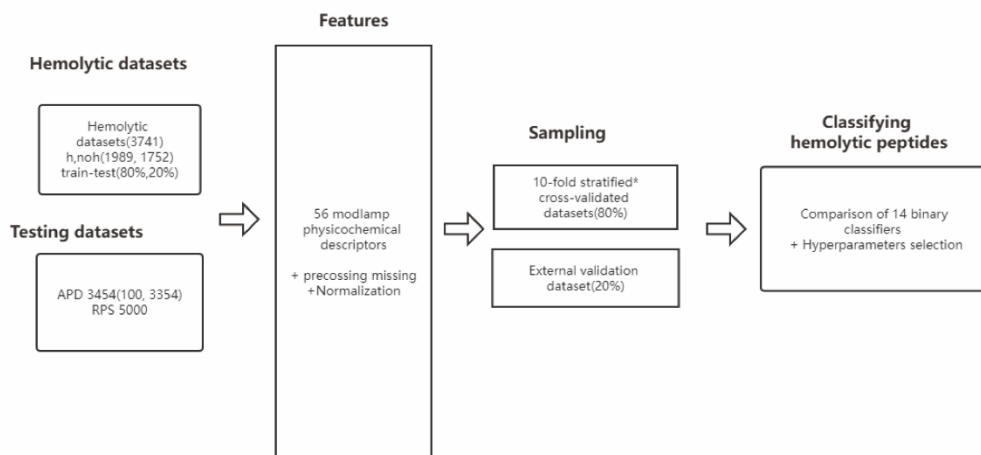

**Figure S3** Hemolytic prediction process of peptides in COMDEL model.

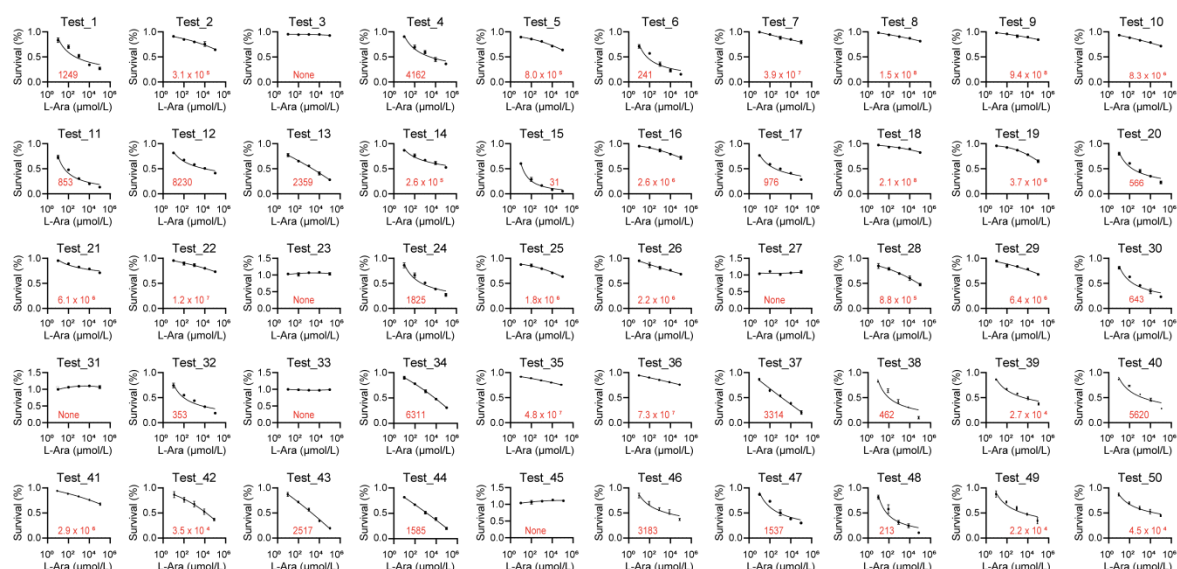

**Figure S4** The survival curve of *E. coli* DH5 $\alpha$  caused by the expression intensities of peptide candidates. The expression of peptide candidate was under the control of arabinose operon using pBAD18 vector. The minimum inhibitory concentration reached by 50% (MIC<sub>50</sub>) of L-arabinose was calculated using dose-response (inhibition) equation. The calculated MIC<sub>50</sub> was marked in red.

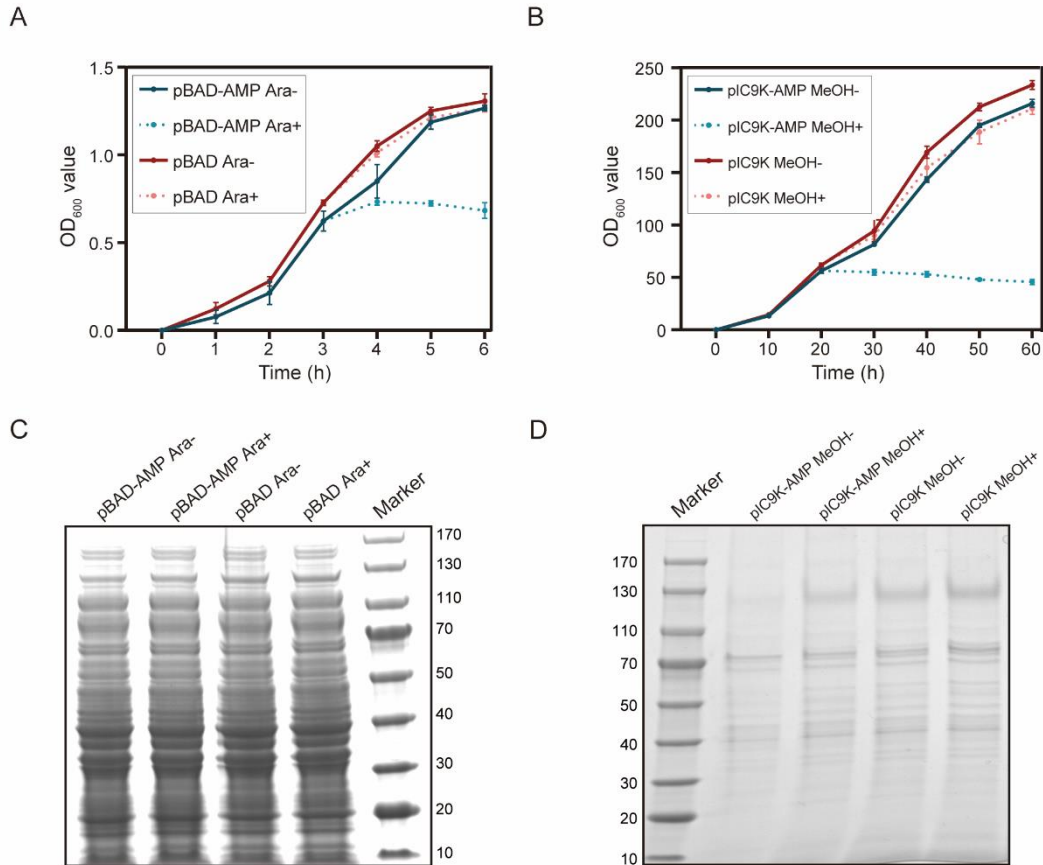

**Figure S5** Antimicrobial peptides expressed in *E. coli* and *Pichia yeast*. (A) The OD<sub>600</sub> value changes of *E. coli* DH5 $\alpha$  containing AMP or empty vector under the condition with or without inducer L- arabinose. (B) The OD<sub>600</sub> value changes of *Pichia yeast* containing AMP or empty vector under the condition with or without inducer methanol. (C) SDS-PAGE detected AMP expression in *E. coli* BL21(DE3). (D) SDS-PAGE detected AMP expression in *Pichia yeast*.

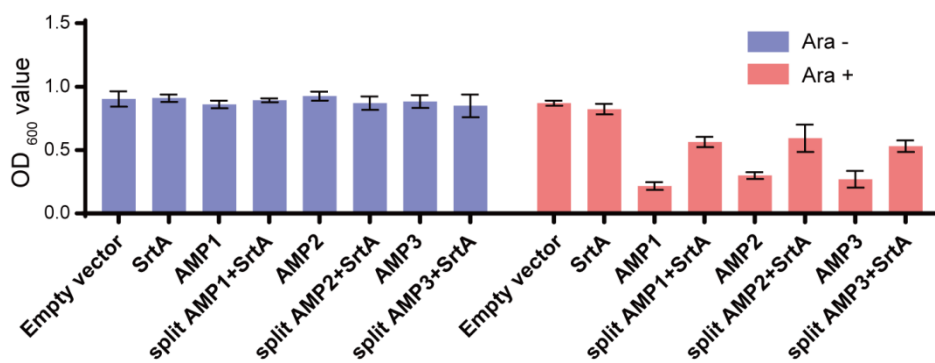

**Figure S6** Peptide ligation activity verification of SrtA through AMP effect on strain growth.

A

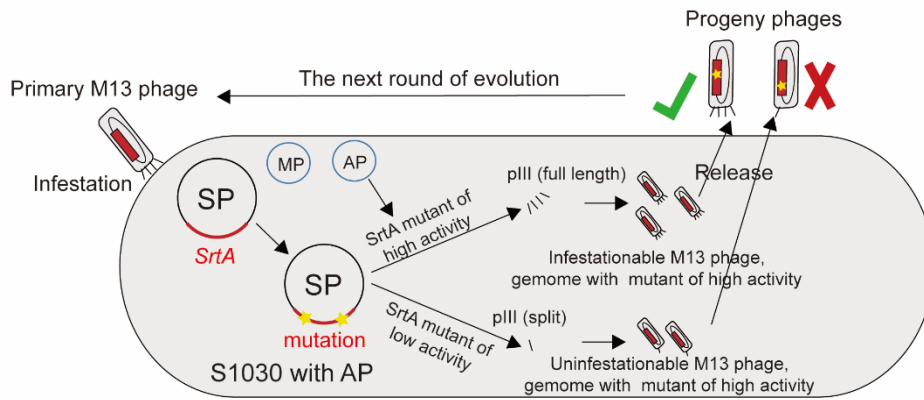

**Figure S7** Process diagram of PANCE for SrtA. The activity of SrtA mutants on SP is higher, the more intact pIII proteins are produced, and more infective bacteriophages can be packaged.

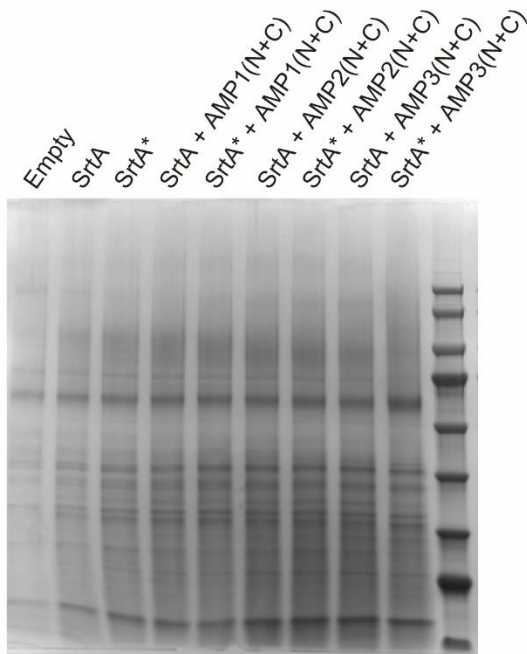

**Figure S8** The yield of AMP ligated by SrtA WT or mutant verified by SDS-PAGE.

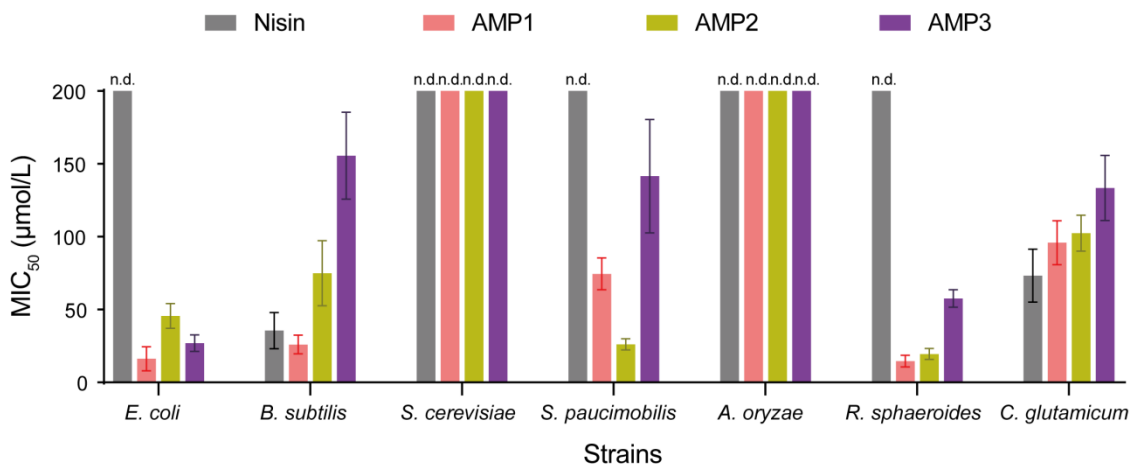

**Figure S9** Bacteriostatic test of three purified AMPs. The minimum inhibitory concentration (MIC<sub>50</sub>) was calculated using the dose-response (inhibition) equation. The n.d. marked on the column means the MIC<sub>50</sub> value is greater than 200 µmol/L.

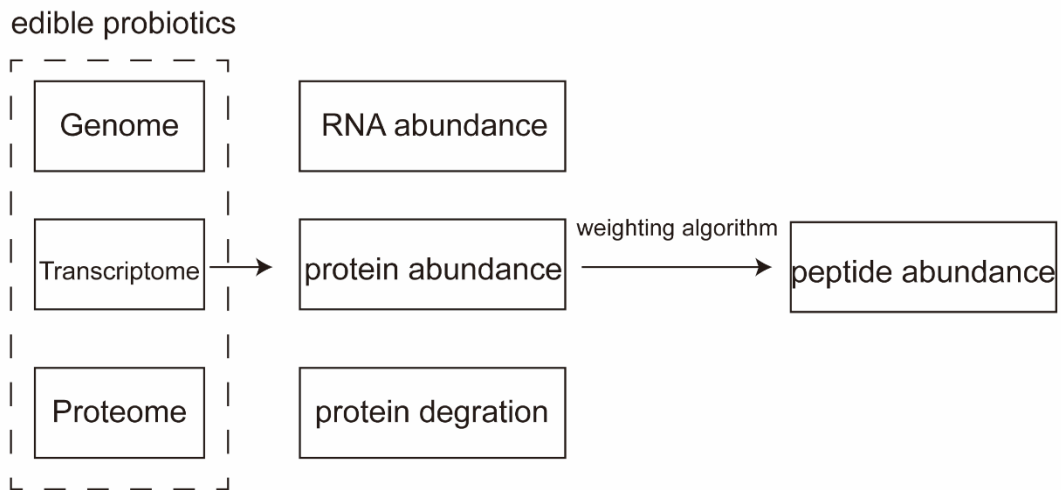

**Figure S10** Peptide expression abundance processing for edible probiotics.



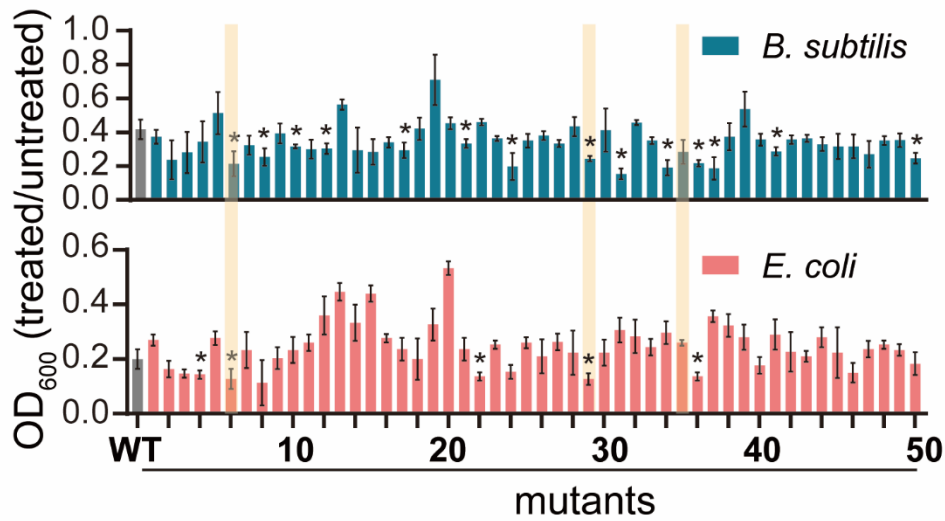

**Figure S11** Verification of antibacterial activity of probiotic mutant fermentation product. An asterisk indicates that the data is significantly different.

**Table S1.** Strains and plasmids used in this study.

| Strains                   | Description                                                               | Source     |
|---------------------------|---------------------------------------------------------------------------|------------|
| S1030                     | Strain for PANCE                                                          | Addgene    |
| DH5 $\alpha$              | Cloning strain                                                            | TransGen   |
| BL21(DE3)                 | Protein expression strain                                                 | TransGen   |
| <i>B. subtilis</i> 168    | Protein expression strain                                                 | Biofeng    |
| <i>S.cerevisiae</i> S288C | Antimicrobial test                                                        | ATCC       |
| <i>S.paucimobilis</i>     | Antimicrobial test                                                        | ATCC       |
| <i>A. oryzae</i>          | Antimicrobial test                                                        | ATCC       |
| <i>R. sphaeroides</i>     | Antimicrobial test                                                        | ATCC       |
| <i>C. glutamicum</i>      | Antimicrobial test                                                        | ATCC       |
| <i>L. plantarum</i>       | Antimicrobial test                                                        | ATCC       |
| <i>B. longum</i>          | Antimicrobial test                                                        | ATCC       |
| <i>B. bifidum</i>         | Antimicrobial test                                                        | ATCC       |
| <i>L. reuteri</i>         | Antimicrobial test                                                        | ATCC       |
| <i>L. lactis</i>          | Antimicrobial test                                                        | ATCC       |
| pBAD18                    | Protein expression plasmid                                                | Biofeng    |
| pBAD18-COMDEL_u (1-10)    | The expression plasmid for 10 COMDEL_u peptides                           | this study |
| pBAD18-COMDEL_e (1-10)    | The expression plasmid for 10 COMDEL_e peptides                           | this study |
| pBAD18-150N               | The 150 bp random library                                                 | this study |
| pBAD18-AMP (1-10)         | The expression plasmid for 10 AMPs screened by High-throughput technology | this study |
| pBAD18-AMP (11-60)        | The expression plasmid for 50 AMPs to test the accuracy of COMDEL         | this study |
| MP4                       | Mutagenesis plasmid for PANCE                                             | Addgene    |
| pJC175e                   | gIII expression vector for PANCE                                          | Addgene    |
| M13 phage                 | M13 phage DNA                                                             | Zymostar   |
| M13 phage for SrtA        | SP for PANCE                                                              | this study |
| AP-split-gIII             | AP for PANCE                                                              | this study |

|                 |                                                        |            |
|-----------------|--------------------------------------------------------|------------|
| pBAD-GFP        | GFP expression plasmid                                 | this study |
| pBAD-SrtA       | SrtA expression plasmid                                | this study |
| pBAD-SrtA*      | SrtA* expression plasmid                               | this study |
| pBAD-AMP1       | AMP1 expression plasmid                                | this study |
| pBAD-AMP1 (N+C) | Split AMP1 expression plasmid                          | this study |
| pBAD-AMP2       | AMP2 expression plasmid                                | this study |
| pBAD-AMP2 (N+C) | Split AMP2 expression plasmid                          | this study |
| pBAD-AMP3       | AMP3 expression plasmid                                | this study |
| pBAD-AMP3 (N+C) | Split AMP3 expression plasmid                          | this study |
| pT7-AMP1        | AMP1 expression plasmid in the CFAS system             | this study |
| pT7-AMP2        | AMP2 expression plasmid in the CFAS system             | this study |
| pT7-AMP3        | AMP3 expression plasmid in the CFAS system             | this study |
| pT7-GFP1-10     | GFP1-10 expression plasmid in <i>E. coli</i> BL21(DE3) | this study |
| pTH01-GFP11     | GFP11 expression plasmid in <i>B. subtilis</i> 168     | this study |

**Table S3.** Primes used in this study.

| Primer        | Sequence (5' – 3')                                                 |
|---------------|--------------------------------------------------------------------|
| SrtA-F        | atgccagatctgggtaccaagc                                             |
| SrtA-R        | ttatttgactctgtagctacaaagattttacg                                   |
| M13-F         | tctttgtagctacagaagtcaataatttcctgcaatatttacctccctccctcaatcgg        |
| M13-R         | ggttttagctgggtaccagatctggcatgtgaaaatctccaaaaaaaggctccaaaagg        |
| M13-check-F   | taaagacaaaaggcgacattcaaccg                                         |
| M13-check-R   | ctgtctttcgtgctgagggtgacg                                           |
| Split-gIII-F  | taattttgttaactttaagaaggagatataccatggattttgattatgaaaagatggc         |
| Split-gIII-R  | tatatcctctttaaagttaacaaaattatttaccggaaccagagccaccaccgg             |
| GFP-F         | atgaggaaaggagaagaactttcactgg                                       |
| GFP10-R       | ttaaaggacaggccatcccaattggag                                        |
| pT7GFP-F      | aattggcgatggcctgtcctttaagatcctaactcgagcaccaccaccaccactgagatcc      |
| pT7GFP-R      | ccagtgaaaagttctctcttctcatatggctgccgcggcaccaggccgctgc               |
| GFP11-F       | atcatatggtttgcacgaatatgtaatgccgccgtataacttaaggatcctctagagtcgacgtcc |
| GFP-R         | ggcattaacatattcgtgcaaaacatgatctctcctctttaaattgggaattgttatccgctc    |
| pBAD-F        | atgtatgtatatccttcttaaagttaaacaaaggtaccgagc                         |
| pBAD-R        | gtcgacctgcaggcatgcaagcttgctg                                       |
| pT7-F         | ggtatatcctctttaaagttaaacaaaattatttctagaggggaattg                   |
| pT7-R         | gatccggctgtaacaaagcccgaagggaagc                                    |
| 150N-F        | cggtacctttgttaactttaagaaggag                                       |
| 150N-R        | ccgcaaaaacagccaagcttgc                                             |
| NGS-F         | acactcttccctacacgacgctcttccgatctcgggtacctttgttaactttaagaaggag      |
| NGS-R         | gtgactggagttcagacgtgtgctcttccgatcccgcaaaaacagccaagcttgc            |
| pIC9K-F       | catcgtttgatccttcgaataaattagttg                                     |
| pIC9K-R       | ttcgcttagacatgactgttctcagttc                                       |
| Split- AMP1-F | taacagtaaggaggaaaaaaaatgggcgttaactccgtggacatcttcaacg               |
| Split-AMP1-R  | cattttttctccttactgttaagagcctttgactgagagcacagaacc                   |
| Split- AMP2-F | taacagtaaggaggaaaaaaaatgggcctgaaaggtaacgggtgactg                   |

|               |                                                                        |
|---------------|------------------------------------------------------------------------|
| Split- AMP2-R | catttttttcctccttactgtagtactgttgacgcattttgctacggtag                     |
| Split- AMP3-F | taacagtaaggaggaaaaaaaaatgggctgtgctcgtgcctcctttcgacc                    |
| Split- AMP3-R | catttttttcctccttactgtagcagcagcgcacacggcacccaagc                        |
| AMP-F         | gtttagctgggtaccagatctggcatttttttcctccttactgttaccagcttgcctgcaggtcgactta |
| AMP-R         | aaaacgtaaaatctttagctacagaagtcaaataactgtttggcggatgagagaag               |

---

### Caption sentences for Supplementary Table S2, S4, and S5

**Table S2.** The AMP candidates used in this study.

**Table S4.** The high-throughput AMP screening data.

**Table S5.** AMP candidates from soybean (*Glycine Max*) and corn (*Zea Mays*) predicted by COMDEL and other four existing models.
